# Supplementary material
Source: PubMed Central journal article supplement (PMC3812380)

# Figure S1

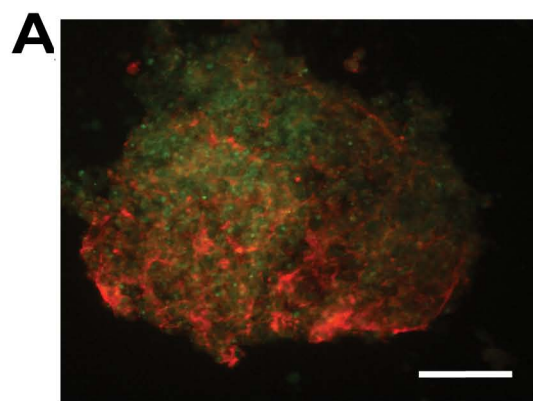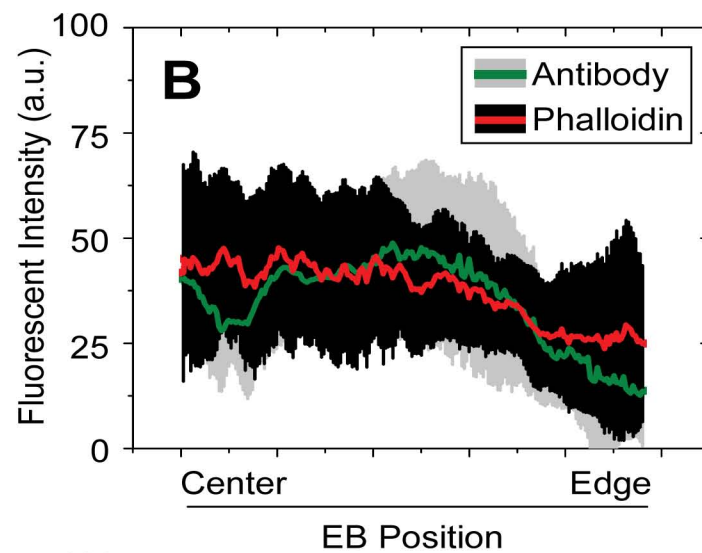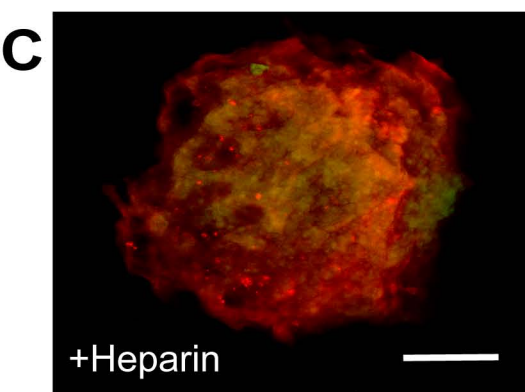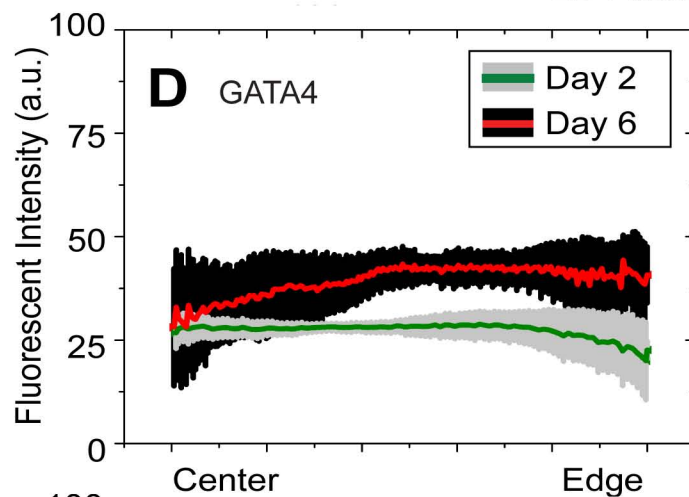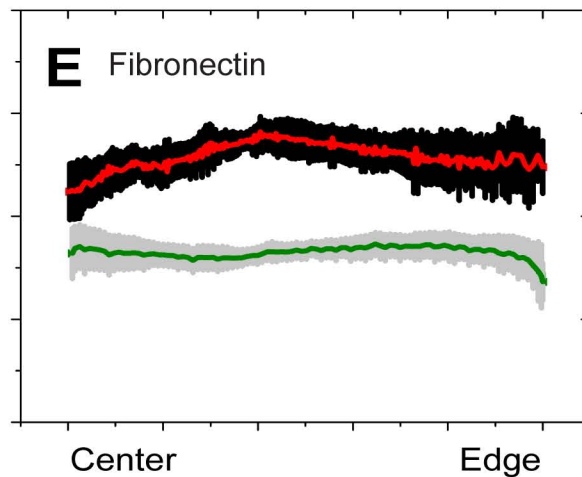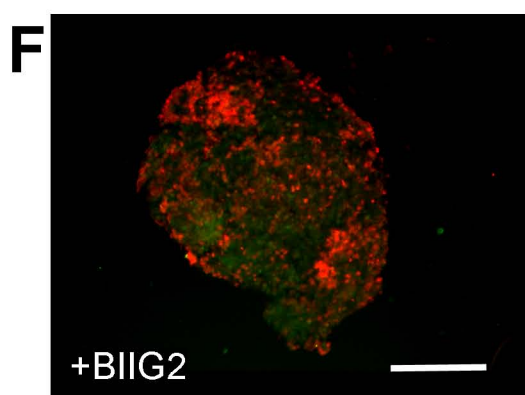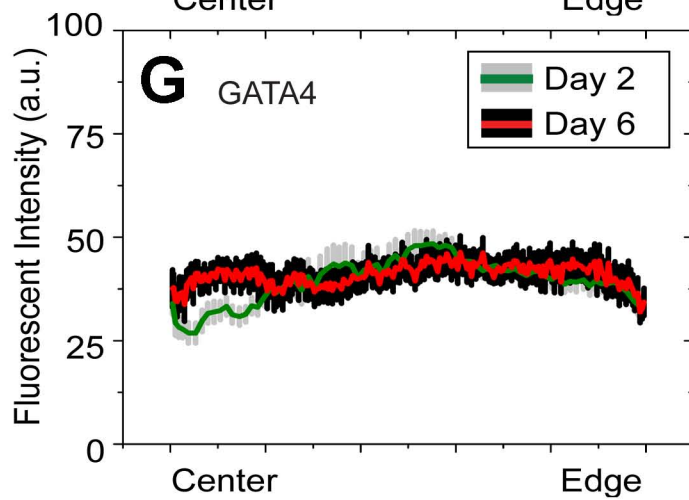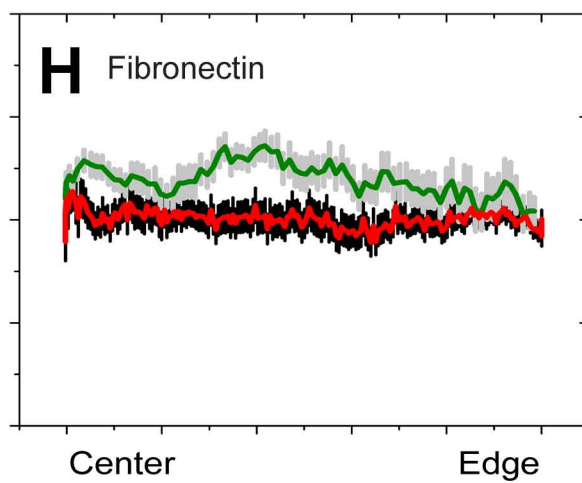

EB Position

**Figure S2**

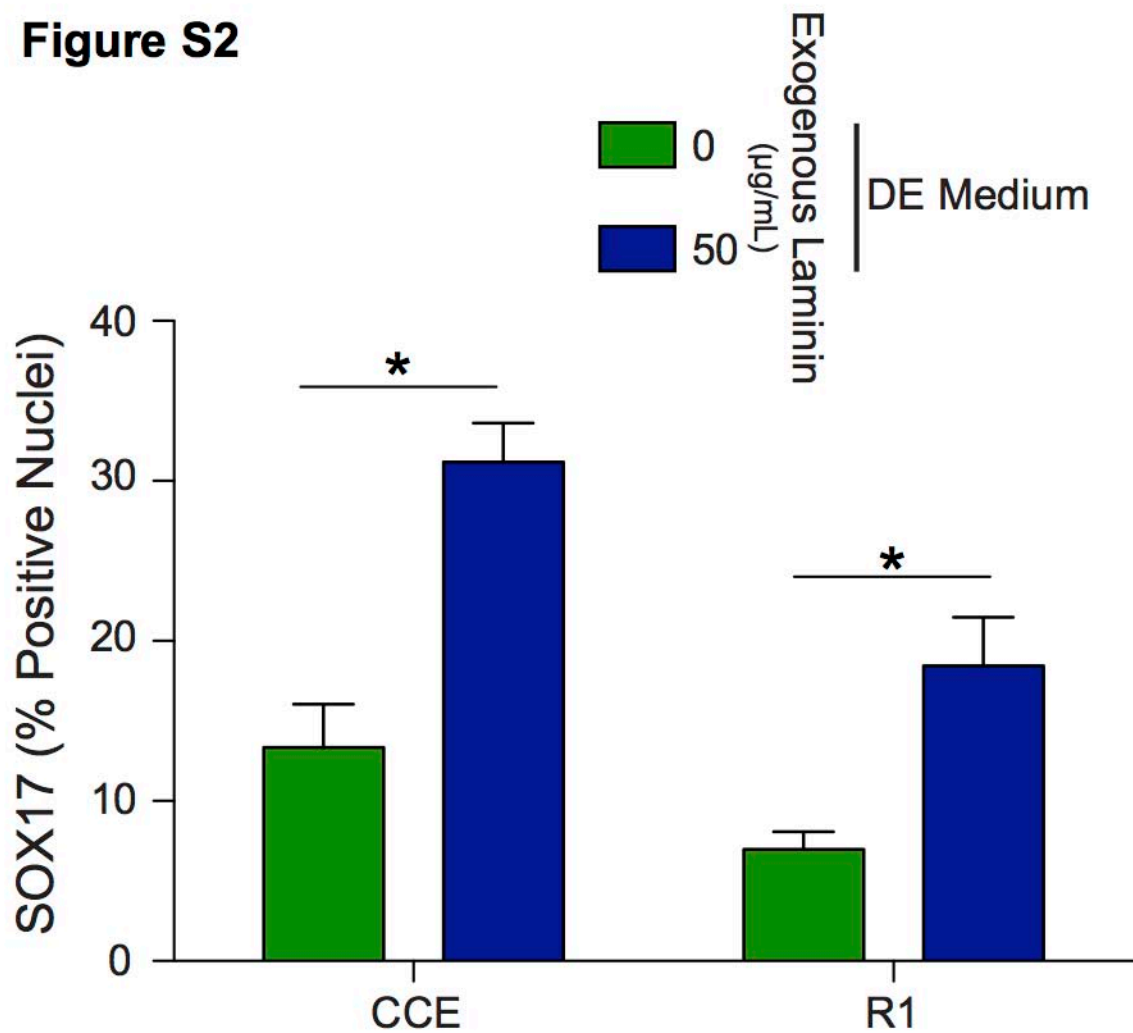

Figure S3

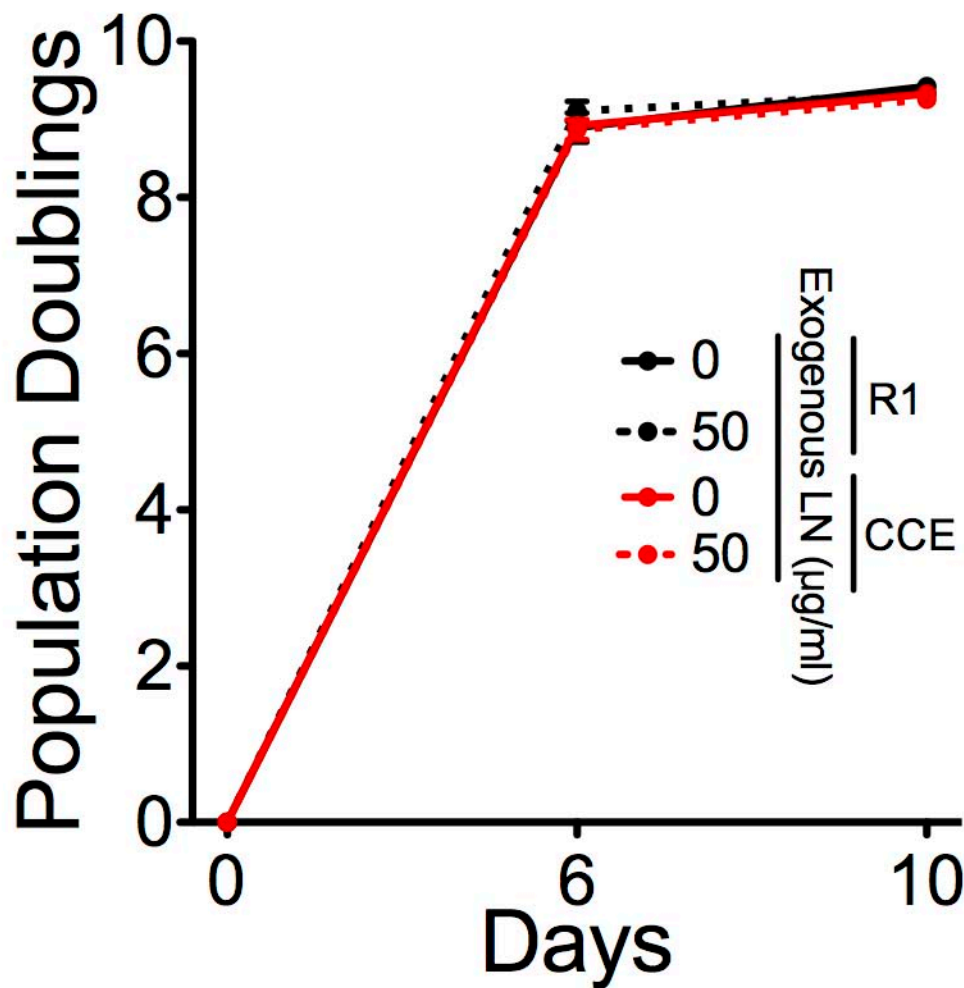

Supplement: NIHMS502965-supplement-Supp_Fig_S1-S3.pdf [file NIHMS502965-supplement-Supp_Fig_S1-S3.pdf]
